# Supplementary material
Source: publisher site journal article supplement (https://www.dovepress.com/article/553681)
Supplement: Supplementary file 1 [file 553681%20Supplementary%20materials_1_1.pdf]

## Supplementary materials

### Supplementary Figures

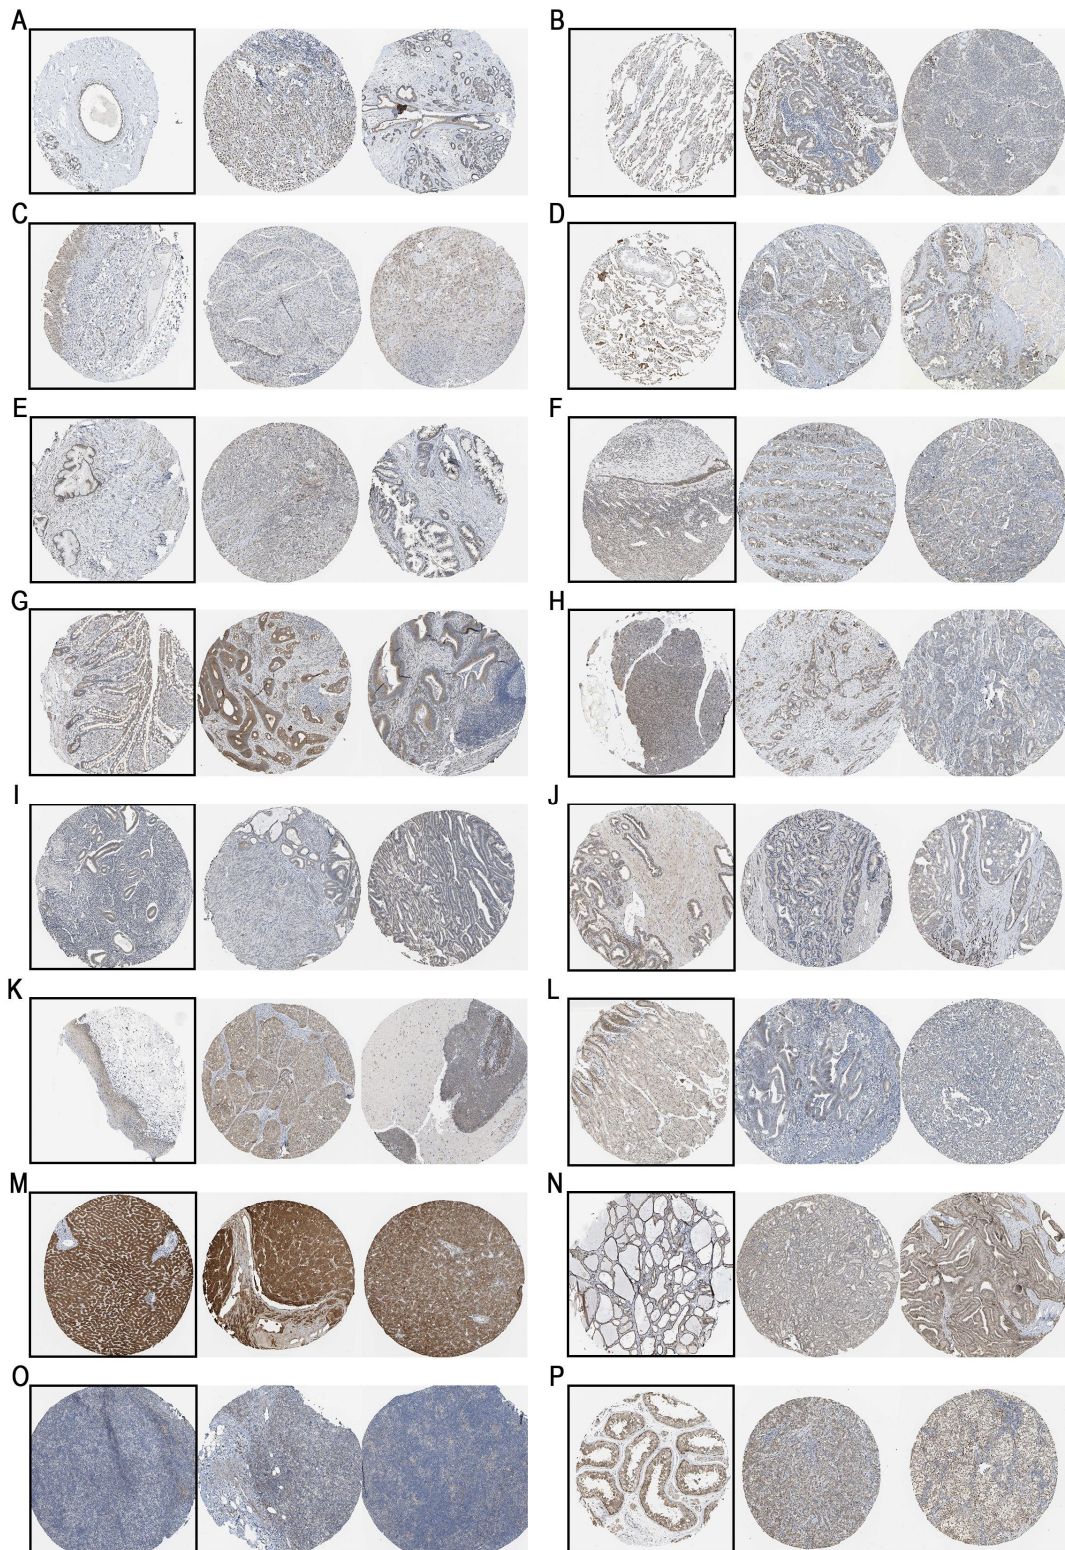

**Figure S1** Immunohistochemical Staining of 16 Normal Tissues and Tumor Tissues from the

HPA Database. **(A)** BRAC, **(B)** LUAD, **(C)** BLCA, **(D)** LUSC, **(E)** CESC, **(F)** OV, **(G)** COAD, **(H)** PAAD, **(I)** UCEC, **(J)** PARD, **(K)** HNSC, **(L)** STAD, **(M)** LIHC, **(N)** THCA, **(O)** DLBC, **(P)** TGCT. Black boxes denote normal tissues, while unboxed images represent tumor tissues.

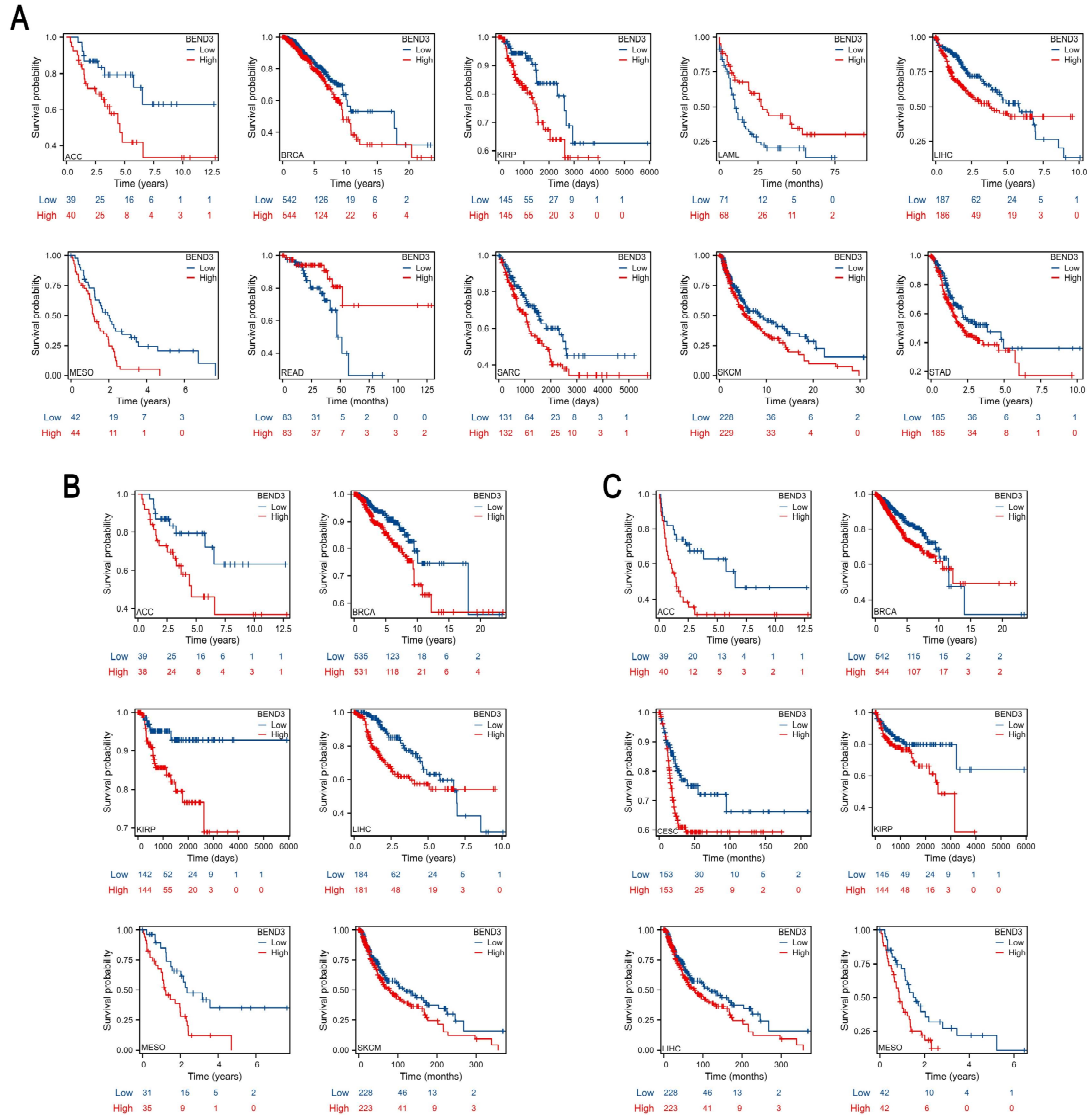

**Figure S2** Kaplan-Meier (KM) Curves Showing the Detailed Association Between BEND3 Expression and Prognosis in Cancer Patients. **(A)** OS in ACC (HR=2.52,  $p=0.023$ ), BRCA (HR=1.41,  $p=0.037$ ), KIRP (HR=2.02,  $p=0.026$ ), LAML (HR=0.37,  $p=0.020$ ), LIHC (HR=1.48,  $p=0.027$ ), MESO (HR=2.09,  $p=0.603$ ), READ (HR=0.37,  $p=0.020$ ), SARC (HR=1.51,  $p=0.045$ ), SKCM (HR=1.38,  $p=0.019$ ) and STAD (HR=1.39,  $p=0.049$ ). **(B)** DSS in ACC (HR=2.34,  $p=0.040$ ), BRCA (HR=1.76,  $p=0.012$ ), KIRP (HR=3.15,  $p=0.009$ ), LIHC (HR=1.92,  $p=0.004$ ), MESO (HR=2.6,  $p=0.003$ ) and SKCM (HR=1.34,  $p=0.047$ ). **(C)** PFS in

ACC (HR=2.28,  $p=0.012$ ), BRCA (HR=1.49,  $p=0.018$ ), CESC (HR=1.74,  $p=0.023$ ), KIRP (HR=1.55,  $p=0.032$ ), LIHC (HR=1.55,  $p=0.004$ ) and MESO (HR=1.85,  $p=0.024$ ).

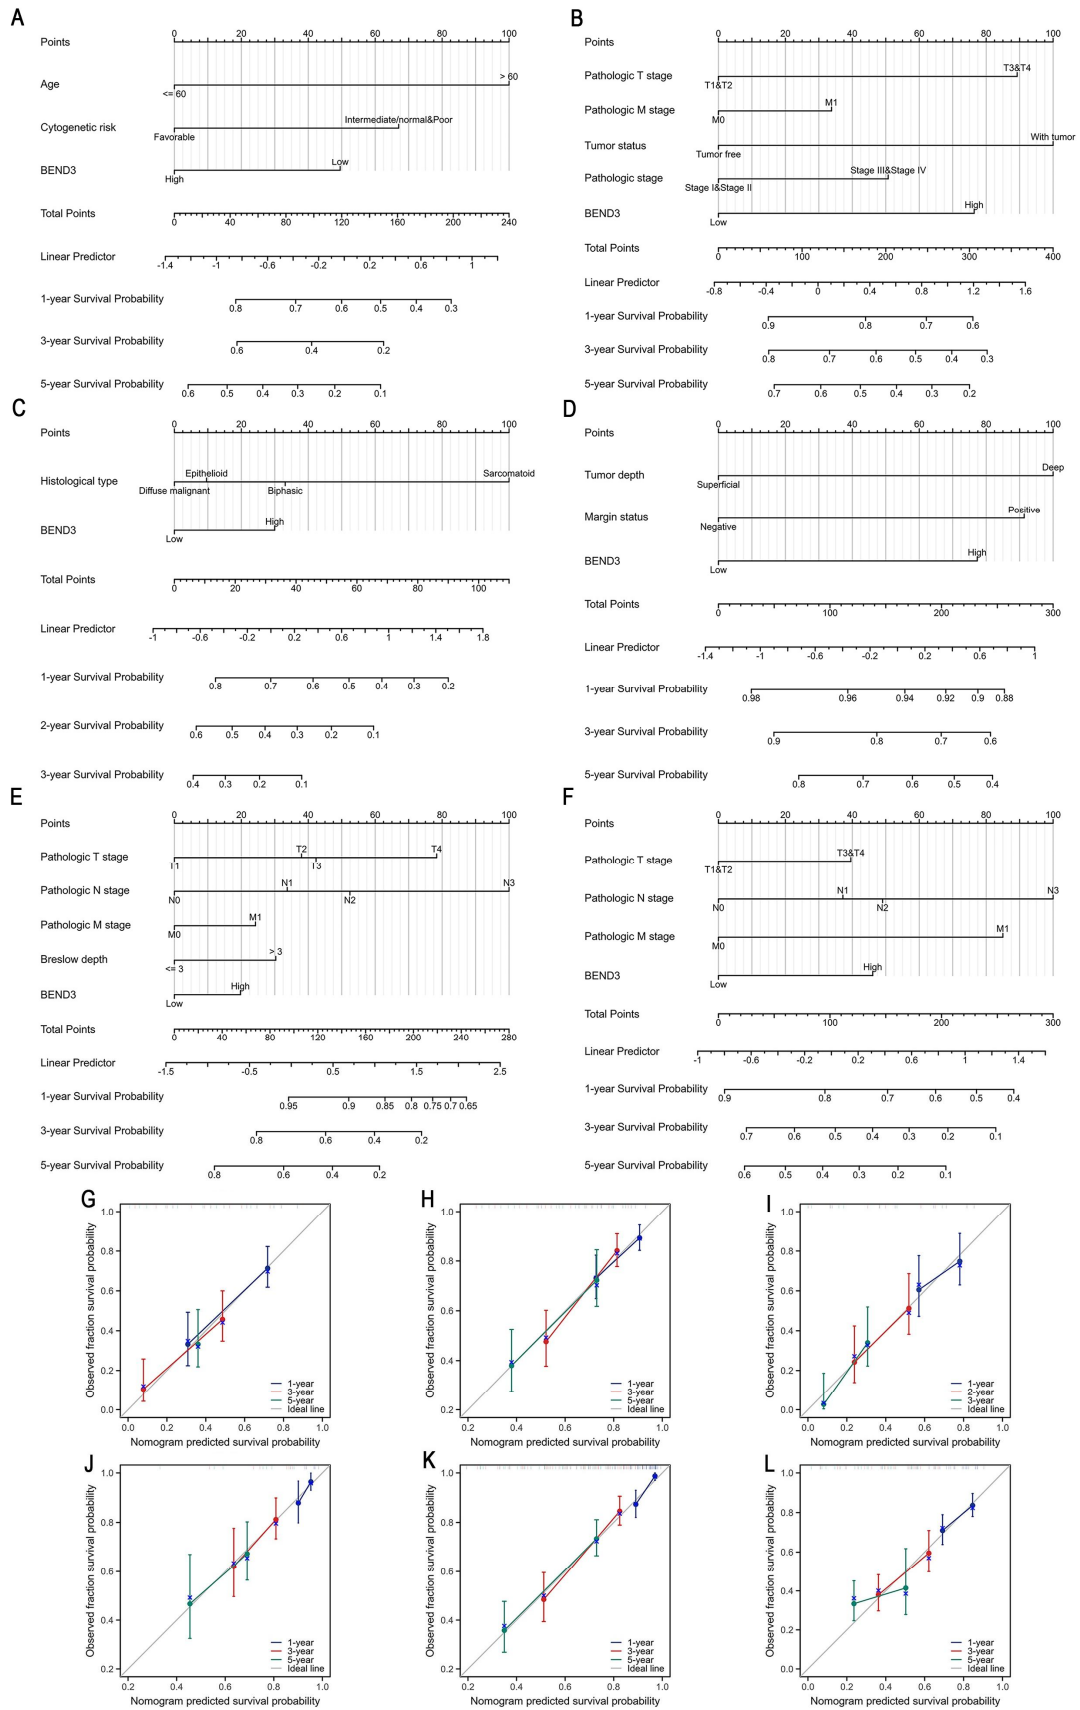

**Figure S3** Nomograms and Calibration Curves Predicting Patient OS in 6 Cancers.

Nomograms of **(A)** LAML, **(B)** LIHC, **(C)** MESO, **(D)** SARC, **(E)** SKCM and **(F)** STAD. Calibration curves of **(G)** LAML, **(H)** LIHC, **(I)** MESO, **(J)** SARC, **(K)** SKCM and **(L)** STAD.

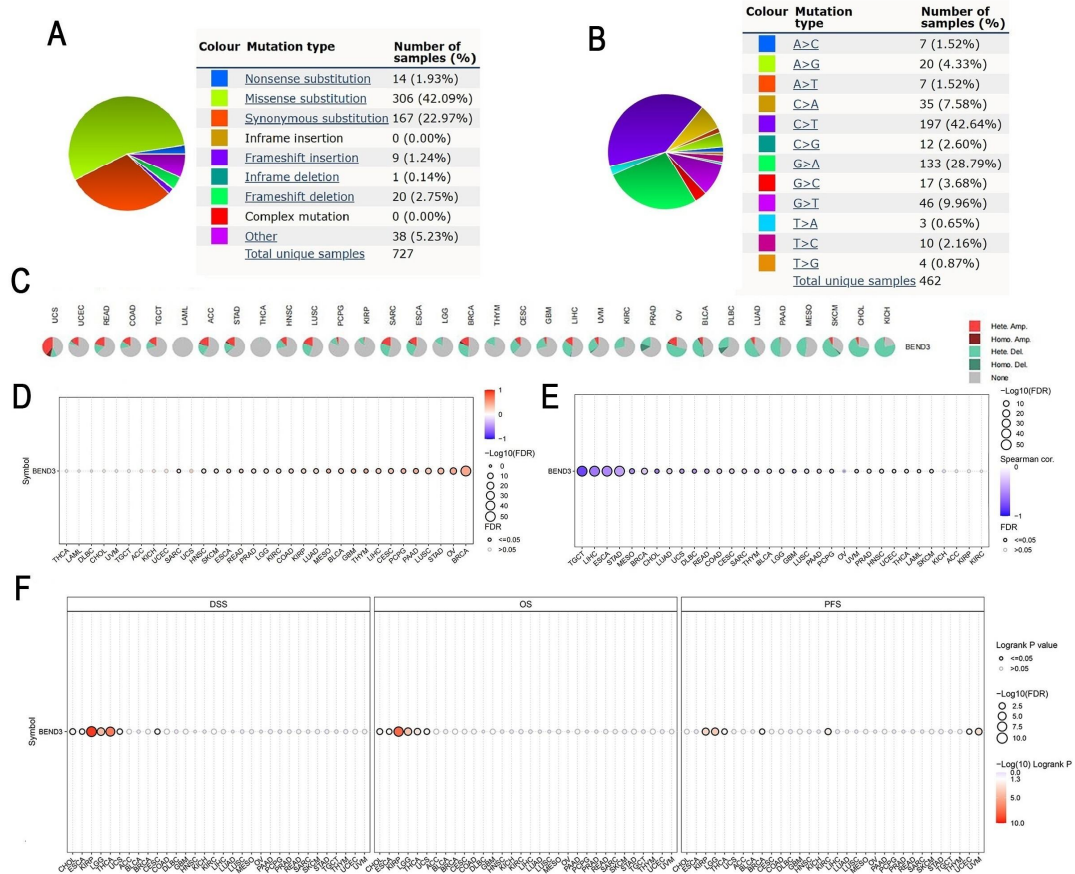

**Figure S4** Mutation analysis and epigenetic methylation analysis of BEND3. **(A)** The main mutation types of BEND3. **(B)** The main types of SNVs in BEND3. **(C)** Percentage of BEND3 CNVs in each cancer. **(D)** Correlation between BEND3 mRNA expression and CNVs. **(E)** Correlation between BEND3 mRNA expression and methylation. **(F)** Effect of BEND3 CNVs on prognosis in cancer patients.

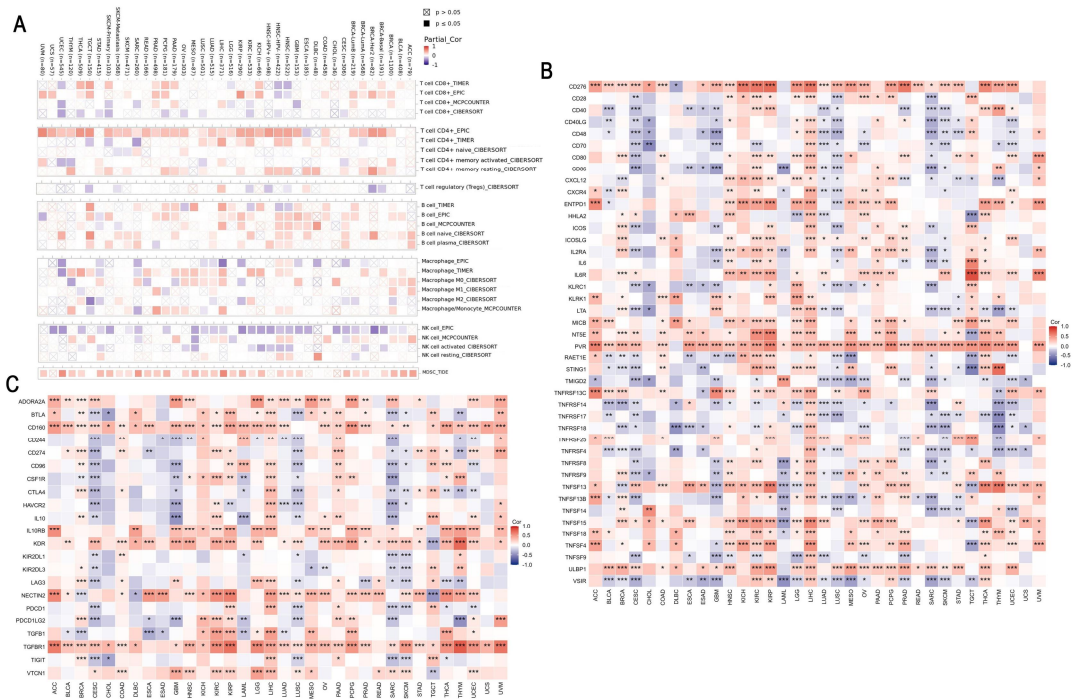

**Figure S5 (A)** Correlation analysis of BEND3 expression with multiple immune cell infiltrates in pan-carcinogenesis. **(B)** Co-expression of BEND3 with immune activating genes. **(C)** Co-expression of BEND3 with immune suppressive genes. \*  $p < 0.05$ , \*\*  $p < 0.01$ , \*\*\*  $p < 0.001$ .

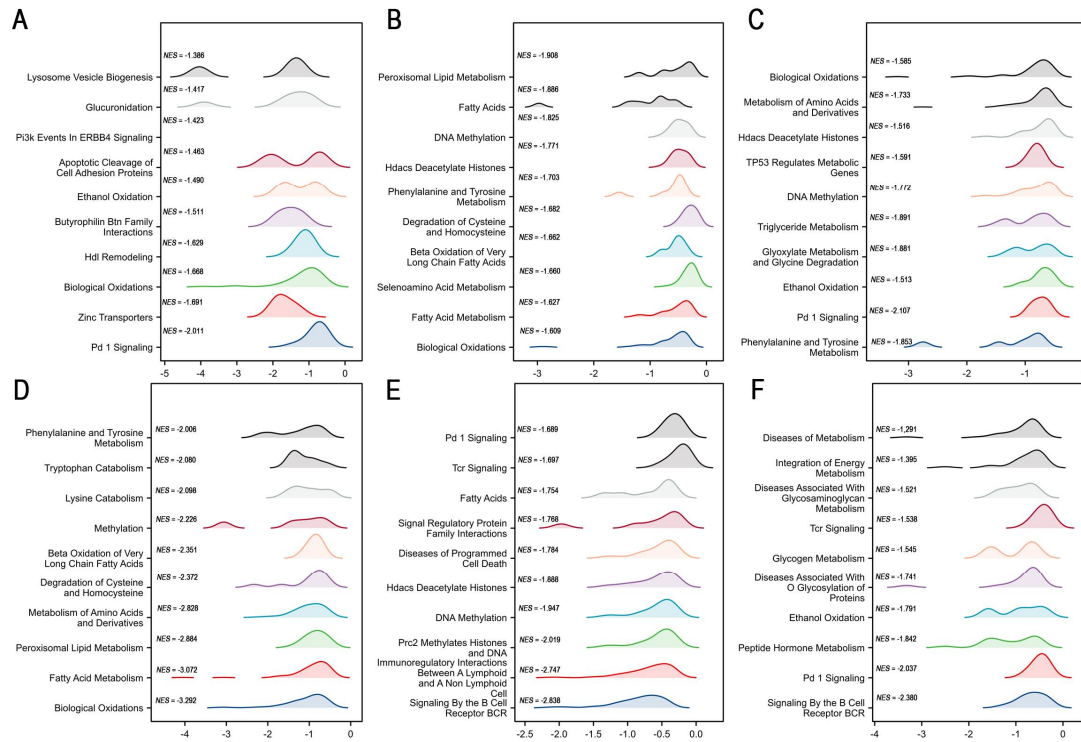

**Figure S6** Functional enrichment analysis of BEND3 in six types of cancer. In **(A)** ACC, **(B)** BRCA, **(C)** KIRP, **(D)** LIHC, **(E)** READ, and **(F)** STAD, the top ten pathways are negatively correlated with BEND3 expression.

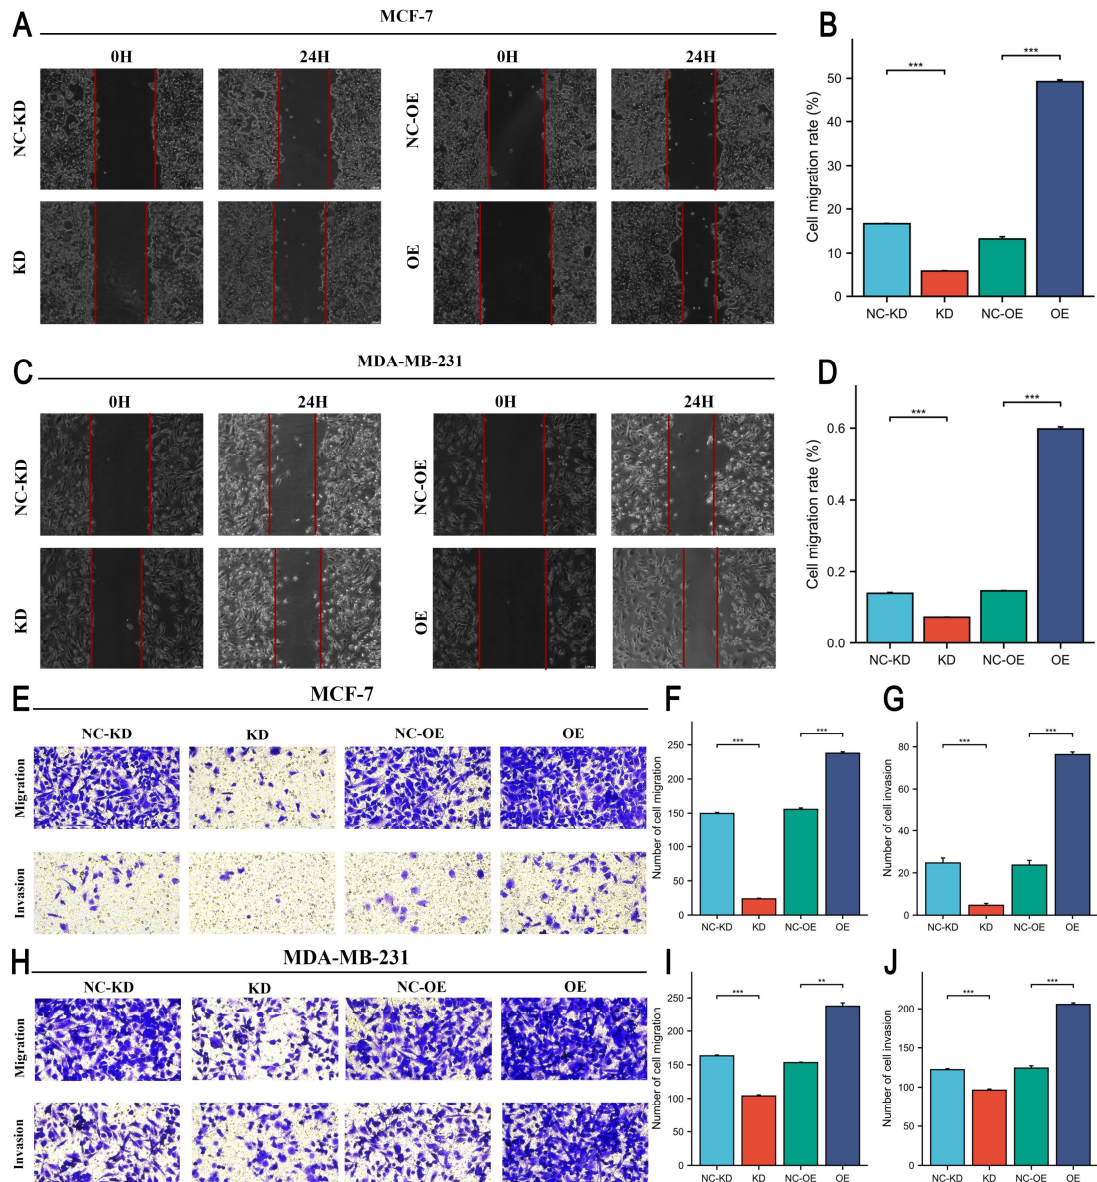

**Figure S7** The Cell wound scratch assay results at 0h and 24h, along with their statistical analysis for the BEND3 NC-KD, KD, NC-OE, and OE using the (A-B) MCF-7 and (C-D) MDA-MB-231 cell lines ( $p < 0.001$ ). The outcomes of the Transwell migration and invasion experiments, along with their statistical analyses in (E-G) MCF-7 and (H-J) MDA-MB-231 cell lines ( $p < 0.001$ ). \*\*  $p < 0.01$ , \*\*\*  $p < 0.001$ .

**Supplementary Table S1.** Sequence information of the shRNA used

| Name       | Targeting sequence (5'→3') |
|------------|----------------------------|
| sh-BEND3-1 | GCAAGAAGCTGGACAAGAA        |

|            |                       |
|------------|-----------------------|
| sh-BEND3-2 | GCAGTTTGTCTGAAGAAT    |
| sh-BEND3-3 | GGACGAAGAGCTGATCAAG   |
| BEND3-OE-F | AGGCGGCGGAGGCGGAG     |
| BEND3-OE-R | GCCGGTGTAGTTGTTGATGA  |
| BEND3-F    | CAGGAGTGC GTTCTACAACG |
| BEND3-R    | TGCTGGTGGTGTGTTGTAG   |
| GAPDH-F    | GAAGGTGAAGGTTCGGAGTC  |
| GAPDH-R    | GAAGATGGTGATGGGATTT   |

**Supplementary Table S2.** Results of univariate and multivariate Cox analysis of clinical parameters in **(A)** ACC, **(B)** BRCA, **(C)** KIRP, **(D)** READ, **(E)** LAML, **(F)** LIHC, **(G)** MESO, **(H)** SARC, **(I)** SKCM and **(J)** STAD, Bold values indicate statistical significance at  $p < 0.05$ .

Supplementary Table S2A. ACC

| Characteristics    | Total(N) | Univariate analysis     |                   | Multivariate analysis  |         |
|--------------------|----------|-------------------------|-------------------|------------------------|---------|
|                    |          | Hazard ratio (95% CI)   | P value           | Hazard ratio (95% CI)  | P value |
| Pathologic T stage | 77       |                         |                   |                        |         |
| T1&T2              | 51       | Reference               |                   | Reference              |         |
| T3&T4              | 26       | 10.286 (3.976 - 26.608) | <b>&lt; 0.001</b> | 7.409 (0.901 - 60.900) | 0.062   |
| Clinical M stage   | 77       |                         |                   |                        |         |
| M0                 | 62       | Reference               |                   | Reference              |         |
| M1                 | 15       | 6.150 (2.710 - 13.959)  | <b>&lt; 0.001</b> | 0.261 (0.044 - 1.546)  | 0.139   |
| Pathologic stage   | 77       |                         |                   |                        |         |
| Stage I&Stage II   | 46       | Reference               |                   | Reference              |         |

| Characteristics         | Total(N) | Univariate analysis     |                   | Multivariate analysis   |                   |
|-------------------------|----------|-------------------------|-------------------|-------------------------|-------------------|
|                         |          | Hazard ratio (95% CI)   | P value           | Hazard ratio (95% CI)   | P value           |
| Stage III&Stage IV      | 31       | 6.476 (2.706 - 15.498)  | <b>&lt; 0.001</b> | 0.905 (0.099 - 8.297)   | 0.930             |
| Primary therapy outcome | 67       |                         |                   |                         |                   |
| PR&CR                   | 47       | Reference               |                   | Reference               |                   |
| PD&SD                   | 20       | 15.754 (5.017 - 49.472) | <b>&lt; 0.001</b> | 15.825 (3.298 - 75.933) | <b>&lt; 0.001</b> |
| BEND3                   | 79       |                         |                   |                         |                   |
| Low                     | 39       | Reference               |                   | Reference               |                   |
| High                    | 40       | 2.518 (1.136 - 5.582)   | <b>0.023</b>      | 3.241 (0.739 - 14.217)  | 0.119             |

Bold values indicate statistical significance at  $p < 0.05$ .

Supplementary Table S2B. BRCA

| Characteristics    | Total(N) | Univariate analysis   |              | Multivariate analysis |         |
|--------------------|----------|-----------------------|--------------|-----------------------|---------|
|                    |          | Hazard ratio (95% CI) | P value      | Hazard ratio (95% CI) | P value |
| Pathologic T stage | 1,083    |                       |              |                       |         |
| T1&T2              | 908      | Reference             |              | Reference             |         |
| T3&T4              | 175      | 1.588 (1.096 - 2.301) | <b>0.014</b> | 0.952 (0.526 - 1.722) | 0.871   |
| Pathologic N stage | 1,067    |                       |              |                       |         |

| Characteristics    | Total(N) | Univariate analysis   |                | Multivariate analysis  |              |
|--------------------|----------|-----------------------|----------------|------------------------|--------------|
|                    |          | Hazard ratio (95% CI) | P value        | Hazard ratio (95% CI)  | P value      |
| N0                 | 516      | Reference             |                | Reference              |              |
| N1                 | 358      | 1.947 (1.322 - 2.865) | < <b>0.001</b> | 1.162 (0.656 - 2.059)  | 0.606        |
| N2                 | 116      | 2.522 (1.484 - 4.287) | < <b>0.001</b> | 1.798 (0.629 - 5.141)  | 0.273        |
| N3                 | 77       | 4.191 (2.318 - 7.580) | < <b>0.001</b> | 3.932 (1.395 - 11.078) | <b>0.010</b> |
| Pathologic M stage | 925      |                       |                |                        |              |
| M0                 | 905      | Reference             |                | Reference              |              |
| M1                 | 20       | 4.266 (2.474 - 7.354) | < <b>0.001</b> | 2.752 (1.150 - 6.590)  | <b>0.023</b> |
| Pathologic stage   | 1,062    |                       |                |                        |              |
| Stage I            | 181      | Reference             |                | Reference              |              |
| Stage II           | 619      | 1.703 (0.989 - 2.933) | 0.055          | 1.772 (0.834 - 3.766)  | 0.137        |
| Stage III&Stage IV | 262      | 3.566 (2.042 - 6.228) | < <b>0.001</b> | 2.513 (0.755 - 8.367)  | 0.133        |
| Menopause status   | 975      |                       |                |                        |              |
| Pre&Peri           | 270      | Reference             |                | Reference              |              |
| Post               | 705      | 2.336 (1.421 - 3.840) | < <b>0.001</b> | 2.317 (1.362 - 3.939)  | <b>0.002</b> |
| Anatomic neoplasm  | 1,086    |                       |                |                        |              |

| Characteristics | Total(N) | Univariate analysis   |              | Multivariate analysis |              |
|-----------------|----------|-----------------------|--------------|-----------------------|--------------|
|                 |          | Hazard ratio (95% CI) | P value      | Hazard ratio (95% CI) | P value      |
| subdivisions    |          |                       |              |                       |              |
| Left            | 566      | Reference             |              |                       |              |
| Right           | 520      | 0.770 (0.557 - 1.063) | 0.112        |                       |              |
| BEND3           |          |                       |              |                       |              |
| Low             | 542      | Reference             |              | Reference             |              |
| High            | 544      | 1.412 (1.021 - 1.951) | <b>0.037</b> | 1.591 (1.045 - 2.421) | <b>0.030</b> |

Bold values indicate statistical significance at  $p < 0.05$ .

Supplementary Table S2C. KIRP

| Characteristics    | Total(N) | Univariate analysis   |         | Multivariate analysis |         |
|--------------------|----------|-----------------------|---------|-----------------------|---------|
|                    |          | Hazard ratio (95% CI) | P value | Hazard ratio (95% CI) | P value |
| Sex                |          |                       |         |                       |         |
| Female             | 77       | Reference             |         |                       |         |
| Male               | 213      | 0.630 (0.327 - 1.213) | 0.167   |                       |         |
| Laterality         |          |                       |         |                       |         |
| Left               | 160      | Reference             |         |                       |         |
| Right              | 127      | 0.725 (0.387 - 1.357) | 0.315   |                       |         |
| Pathologic T stage |          |                       |         |                       |         |
| T1&T2              | 226      | Reference             |         | Reference             |         |

| Characteristics         | Total(N) | Univariate analysis    |                   | Multivariate analysis  |                   |
|-------------------------|----------|------------------------|-------------------|------------------------|-------------------|
|                         |          | Hazard ratio (95% CI)  | P value           | Hazard ratio (95% CI)  | P value           |
| T3&T4                   | 62       | 4.874 (2.658 - 8.937)  | <b>&lt; 0.001</b> | 0.650 (0.172 - 2.458)  | 0.525             |
| Age                     | 288      |                        |                   |                        |                   |
| <= 60                   | 135      | Reference              |                   |                        |                   |
| > 60                    | 153      | 0.969 (0.533 - 1.762)  | 0.917             |                        |                   |
| Primary therapy outcome | 199      |                        |                   |                        |                   |
| PR&CR                   | 187      | Reference              |                   | Reference              |                   |
| PD&SD                   | 12       | 6.168 (2.572 - 14.792) | <b>&lt; 0.001</b> | 3.123 (1.070 - 9.122)  | <b>0.037</b>      |
| Pathologic stage        | 260      |                        |                   |                        |                   |
| Stage I&Stage II        | 193      | Reference              |                   | Reference              |                   |
| Stage III&Stage IV      | 67       | 6.261 (3.252 - 12.052) | <b>&lt; 0.001</b> | 8.277 (2.363 - 28.993) | <b>&lt; 0.001</b> |
| BEND3                   | 290      |                        |                   |                        |                   |
| Low                     | 145      | Reference              |                   | Reference              |                   |
| High                    | 145      | 2.018 (1.087 - 3.745)  | <b>0.026</b>      | 2.966 (1.140 - 7.721)  | <b>0.026</b>      |

Bold values indicate statistical significance at  $p < 0.05$ .

Supplementary Table S2D. READ

| Characteristics | Total(N) | Univariate analysis   |         | Multivariate analysis |         |
|-----------------|----------|-----------------------|---------|-----------------------|---------|
|                 |          | Hazard ratio (95% CI) | P value | Hazard ratio (95% CI) | P value |

| Characteristics    | Total(N) | Univariate analysis   |              | Multivariate analysis  |              |
|--------------------|----------|-----------------------|--------------|------------------------|--------------|
|                    |          | Hazard ratio (95% CI) | P value      | Hazard ratio (95% CI)  | P value      |
| Pathologic T stage | 164      |                       |              |                        |              |
| T1&T2              | 37       | Reference             |              |                        |              |
| T3&T4              | 127      | 1.408 (0.476 - 4.159) | 0.536        |                        |              |
| Pathologic N stage | 162      |                       |              |                        |              |
| N0                 | 84       | Reference             |              | Reference              |              |
| N1                 | 45       | 2.400 (0.834 - 6.906) | 0.105        | 1.210 (0.337 - 4.343)  | 0.770        |
| N2                 | 33       | 3.683 (1.390 - 9.762) | <b>0.009</b> | 4.348 (1.424 - 13.270) | <b>0.010</b> |
| Pathologic M stage | 149      |                       |              |                        |              |
| M0                 | 126      | Reference             |              | Reference              |              |
| M1                 | 23       | 3.412 (1.424 - 8.174) | <b>0.006</b> | 2.703 (1.004 - 7.273)  | <b>0.049</b> |
| Age                | 166      |                       |              |                        |              |
| <= 65              | 82       | Reference             |              | Reference              |              |
| > 65               | 84       | 3.843 (1.535 - 9.622) | <b>0.004</b> | 6.530 (2.112 - 20.188) | <b>0.001</b> |
| BMI                | 73       |                       |              |                        |              |
| <= 25              | 20       | Reference             |              |                        |              |
| > 25               | 53       | 1.218 (0.341 - 4.351) | 0.762        |                        |              |

| Characteristics | Total(N) | Univariate analysis   |              | Multivariate analysis |              |
|-----------------|----------|-----------------------|--------------|-----------------------|--------------|
|                 |          | Hazard ratio (95% CI) | P value      | Hazard ratio (95% CI) | P value      |
| Sex             | 166      |                       |              |                       |              |
| Female          | 75       | Reference             |              |                       |              |
| Male            | 91       | 0.916 (0.422 - 1.988) | 0.824        |                       |              |
| CEA level       | 112      |                       |              |                       |              |
| <= 5            | 65       | Reference             |              |                       |              |
| > 5             | 47       | 1.453 (0.489 - 4.316) | 0.501        |                       |              |
| BEND3           | 166      |                       |              |                       |              |
| Low             | 83       | Reference             |              | Reference             |              |
| High            | 83       | 0.369 (0.160 - 0.854) | <b>0.020</b> | 0.366 (0.142 - 0.945) | <b>0.038</b> |

Bold values indicate statistical significance at  $p < 0.05$ .

Supplementary Table S2E. LAML

| Characteristics  | Total(N) | Univariate analysis   |                   | Multivariate analysis |                   |
|------------------|----------|-----------------------|-------------------|-----------------------|-------------------|
|                  |          | Hazard ratio (95% CI) | P value           | Hazard ratio (95% CI) | P value           |
| Age              | 139      |                       |                   |                       |                   |
| <= 60            | 78       | Reference             |                   | Reference             |                   |
| > 60             | 61       | 3.321 (2.156 - 5.116) | <b>&lt; 0.001</b> | 2.978 (1.907 - 4.649) | <b>&lt; 0.001</b> |
| Cytogenetic risk | 137      |                       |                   |                       |                   |
| Favorable        | 30       | Reference             |                   | Reference             |                   |

| Characteristics          | Total(N) | Univariate analysis   |                   | Multivariate analysis |              |
|--------------------------|----------|-----------------------|-------------------|-----------------------|--------------|
|                          |          | Hazard ratio (95% CI) | P value           | Hazard ratio (95% CI) | P value      |
| Intermediate/normal&Poor | 107      | 3.184 (1.637 - 6.193) | <b>&lt; 0.001</b> | 2.078 (1.037 - 4.164) | <b>0.039</b> |
| BEND3                    | 139      |                       |                   |                       |              |
| Low                      | 71       | Reference             |                   | Reference             |              |
| High                     | 68       | 0.521 (0.339 - 0.802) | <b>0.003</b>      | 0.582 (0.372 - 0.913) | <b>0.018</b> |

Bold values indicate statistical significance at  $p < 0.05$ .

Supplementary Table S2F. LIHC

| Characteristics    | Total(N) | Univariate analysis   |                   | Multivariate analysis |              |
|--------------------|----------|-----------------------|-------------------|-----------------------|--------------|
|                    |          | Hazard ratio (95% CI) | P value           | Hazard ratio (95% CI) | P value      |
| Pathologic T stage | 370      |                       |                   |                       |              |
| T1&T2              | 277      | Reference             |                   | Reference             |              |
| T3&T4              | 93       | 2.598 (1.826 - 3.697) | <b>&lt; 0.001</b> | 1.874 (1.076 - 3.264) | <b>0.026</b> |
| Pathologic N stage | 258      |                       |                   |                       |              |
| N0                 | 254      | Reference             |                   |                       |              |
| N1                 | 4        | 2.029 (0.497 - 8.281) | 0.324             |                       |              |
| Pathologic M stage | 272      |                       |                   |                       |              |

| Characteristics                | Total(N) | Univariate analysis    |                   | Multivariate analysis |              |
|--------------------------------|----------|------------------------|-------------------|-----------------------|--------------|
|                                |          | Hazard ratio (95% CI)  | P value           | Hazard ratio (95% CI) | P value      |
| M0                             | 268      | Reference              |                   | Reference             |              |
| M1                             | 4        | 4.077 (1.281 - 12.973) | <b>0.017</b>      | 1.266 (0.301 - 5.326) | 0.748        |
| Tumor status                   | 354      |                        |                   |                       |              |
| Tumor free                     | 202      | Reference              |                   | Reference             |              |
| With tumor                     | 152      | 2.317 (1.590 - 3.376)  | <b>&lt; 0.001</b> | 1.830 (1.142 - 2.932) | <b>0.012</b> |
| BMI                            | 336      |                        |                   |                       |              |
| <= 25                          | 177      | Reference              |                   |                       |              |
| > 25                           | 159      | 0.798 (0.550 - 1.158)  | 0.235             |                       |              |
| Age                            | 373      |                        |                   |                       |              |
| <= 60                          | 177      | Reference              |                   |                       |              |
| > 60                           | 196      | 1.205 (0.850 - 1.708)  | 0.295             |                       |              |
| Pathologic stage               | 349      |                        |                   |                       |              |
| Stage I                        | 173      | Reference              |                   | Reference             |              |
| Stage II&Stage<br>III&Stage IV | 176      | 2.090 (1.429 - 3.055)  | <b>&lt; 0.001</b> | 1.586 (0.867 - 2.901) | 0.134        |
| BEND3                          | 373      |                        |                   |                       |              |
| Low                            | 187      | Reference              |                   | Reference             |              |
| High                           | 186      | 1.478 (1.045 - 2.090)  | <b>0.027</b>      | 1.599 (1.012 - 2.526) | <b>0.044</b> |

Bold values indicate statistical significance at  $p < 0.05$ .

Supplementary Table S2G. MESO

| Characteristics    | Total(N) | Univariate analysis   |         | Multivariate analysis |         |
|--------------------|----------|-----------------------|---------|-----------------------|---------|
|                    |          | Hazard ratio (95% CI) | P value | Hazard ratio (95% CI) | P value |
| Pathologic T stage | 84       |                       |         |                       |         |
| T1                 | 14       | Reference             |         |                       |         |
| T2                 | 25       | 0.977 (0.470 - 2.032) | 0.950   |                       |         |
| T3                 | 32       | 1.056 (0.519 - 2.149) | 0.880   |                       |         |
| T4                 | 13       | 0.775 (0.327 - 1.838) | 0.563   |                       |         |
| Pathologic M stage | 60       |                       |         |                       |         |
| M0                 | 57       | Reference             |         |                       |         |
| M1                 | 3        | 1.856 (0.441 - 7.817) | 0.399   |                       |         |
| Pathologic stage   | 86       |                       |         |                       |         |
| Stage I&Stage II   | 26       | Reference             |         |                       |         |
| Stage III&Stage IV | 60       | 0.993 (0.588 - 1.675) | 0.978   |                       |         |
| Sex                | 86       |                       |         |                       |         |
| Female             | 16       | Reference             |         |                       |         |
| Male               | 70       | 0.888 (0.494 - 1.595) | 0.691   |                       |         |
| Age                | 86       |                       |         |                       |         |
| <= 65              | 46       | Reference             |         |                       |         |

| Characteristics           | Total(N) | Univariate analysis    |              | Multivariate analysis  |              |
|---------------------------|----------|------------------------|--------------|------------------------|--------------|
|                           |          | Hazard ratio (95% CI)  | P value      | Hazard ratio (95% CI)  | P value      |
| > 65                      | 40       | 1.325 (0.826 - 2.125)  | 0.243        |                        |              |
| Histological type         | 86       |                        |              |                        |              |
| Biphasic                  | 23       | Reference              |              | Reference              |              |
| Diffuse malignant         | 5        | 0.575 (0.215 - 1.540)  | 0.271        | 0.425 (0.155 - 1.163)  | 0.096        |
| Epithelioid               | 57       | 0.497 (0.293 - 0.842)  | <b>0.009</b> | 0.545 (0.321 - 0.926)  | <b>0.025</b> |
| Sarcomatoid               | 1        | 3.418 (0.438 - 26.654) | 0.241        | 5.625 (0.697 - 45.410) | 0.105        |
| Residual tumor            | 35       |                        |              |                        |              |
| R0                        | 17       | Reference              |              |                        |              |
| R1&R2                     | 18       | 1.086 (0.522 - 2.259)  | 0.824        |                        |              |
| History asbestos exposure | 69       |                        |              |                        |              |
| No                        | 14       | Reference              |              |                        |              |
| Yes                       | 55       | 0.988 (0.520 - 1.879)  | 0.972        |                        |              |
| Radiation therapy         | 85       |                        |              |                        |              |
| No                        | 60       | Reference              |              |                        |              |
| Yes                       | 25       | 0.682 (0.403 - 1.155)  | 0.155        |                        |              |
| BEND3                     | 86       |                        |              |                        |              |

| Characteristics | Total(N) | Univariate analysis   |              | Multivariate analysis |              |
|-----------------|----------|-----------------------|--------------|-----------------------|--------------|
|                 |          | Hazard ratio (95% CI) | P value      | Hazard ratio (95% CI) | P value      |
| Low             | 42       | Reference             |              | Reference             |              |
| High            | 44       | 2.088 (1.286 - 3.389) | <b>0.003</b> | 2.169 (1.306 - 3.600) | <b>0.003</b> |

Bold values indicate statistical significance at  $p < 0.05$ .

Supplementary Table S2H. SARC

| Characteristics   | Total(N) | Univariate analysis   |              | Multivariate analysis |              |
|-------------------|----------|-----------------------|--------------|-----------------------|--------------|
|                   |          | Hazard ratio (95% CI) | P value      | Hazard ratio (95% CI) | P value      |
| Margin status     | 213      |                       |              |                       |              |
| Negative          | 139      | Reference             |              | Reference             |              |
| Positive          | 74       | 1.957 (1.215 - 3.151) | <b>0.006</b> | 2.102 (1.209 - 3.655) | <b>0.008</b> |
| Tumor depth       | 209      |                       |              |                       |              |
| Superficial       | 21       | Reference             |              | Reference             |              |
| Deep              | 188      | 2.888 (0.910 - 9.168) | 0.072        | 2.259 (0.534 - 9.550) | 0.268        |
| Radiation therapy | 257      |                       |              |                       |              |
| No                | 179      | Reference             |              |                       |              |
| Yes               | 78       | 0.864 (0.557 - 1.339) | 0.513        |                       |              |
| Sex               | 263      |                       |              |                       |              |
| Female            | 144      | Reference             |              |                       |              |

| Characteristics | Total(N) | Univariate analysis   |              | Multivariate analysis |              |
|-----------------|----------|-----------------------|--------------|-----------------------|--------------|
|                 |          | Hazard ratio (95% CI) | P value      | Hazard ratio (95% CI) | P value      |
| Male            | 119      | 0.905 (0.607 - 1.349) | 0.623        |                       |              |
| Age             | 263      |                       |              |                       |              |
| <= 60           | 130      | Reference             |              |                       |              |
| > 60            | 133      | 1.285 (0.864 - 1.911) | 0.216        |                       |              |
| BEND3           | 263      |                       |              |                       |              |
| Low             | 131      | Reference             |              | Reference             |              |
| High            | 132      | 1.509 (1.008 - 2.260) | <b>0.045</b> | 1.875 (1.066 - 3.301) | <b>0.029</b> |

Bold values indicate statistical significance at  $p < 0.05$ .

Supplementary Table S2I. SKCM

| Characteristics    | Total(N) | Univariate analysis   |                   | Multivariate analysis |              |
|--------------------|----------|-----------------------|-------------------|-----------------------|--------------|
|                    |          | Hazard ratio (95% CI) | P value           | Hazard ratio (95% CI) | P value      |
| Pathologic T stage | 362      |                       |                   |                       |              |
| T1                 | 42       | Reference             |                   | Reference             |              |
| T2                 | 77       | 1.523 (0.826 - 2.806) | 0.178             | 1.722 (0.875 - 3.388) | 0.116        |
| T3                 | 90       | 2.135 (1.179 - 3.867) | <b>0.012</b>      | 1.832 (0.909 - 3.694) | 0.091        |
| T4                 | 153      | 3.780 (2.109 - 6.776) | <b>&lt; 0.001</b> | 3.069 (1.312 - 7.181) | <b>0.010</b> |
| Pathologic N stage | 403      |                       |                   |                       |              |

| Characteristics    | Total(N) | Univariate analysis   |                   | Multivariate analysis |                   |
|--------------------|----------|-----------------------|-------------------|-----------------------|-------------------|
|                    |          | Hazard ratio (95% CI) | P value           | Hazard ratio (95% CI) | P value           |
| N0                 | 225      | Reference             |                   | Reference             |                   |
| N1                 | 73       | 1.503 (1.018 - 2.220) | <b>0.040</b>      | 1.620 (1.043 - 2.515) | <b>0.032</b>      |
| N2                 | 49       | 1.540 (0.977 - 2.429) | 0.063             | 2.117 (1.212 - 3.699) | <b>0.008</b>      |
| N3                 | 56       | 2.744 (1.777 - 4.236) | <b>&lt; 0.001</b> | 4.181 (2.442 - 7.157) | <b>&lt; 0.001</b> |
| Pathologic M stage | 431      |                       |                   |                       |                   |
| M0                 | 407      | Reference             |                   | Reference             |                   |
| M1                 | 24       | 1.902 (1.032 - 3.506) | <b>0.039</b>      | 1.414 (0.546 - 3.663) | 0.475             |
| Breslow depth      | 356      |                       |                   |                       |                   |
| <= 3               | 181      | Reference             |                   | Reference             |                   |
| > 3                | 175      | 2.665 (1.948 - 3.644) | <b>&lt; 0.001</b> | 1.543 (0.866 - 2.748) | 0.141             |
| BEND3              | 457      |                       |                   |                       |                   |
| Low                | 228      | Reference             |                   | Reference             |                   |
| High               | 229      | 1.384 (1.054 - 1.818) | <b>0.019</b>      | 1.326 (0.951 - 1.850) | 0.096             |

Bold values indicate statistical significance at  $p < 0.05$ .

Supplementary Table S2J. STAD

| Characteristics | Total(N) | Univariate analysis   |         | Multivariate analysis |         |
|-----------------|----------|-----------------------|---------|-----------------------|---------|
|                 |          | Hazard ratio (95% CI) | P value | Hazard ratio (95% CI) | P value |

| Characteristics    | Total(N) | Univariate analysis   |                   | Multivariate analysis |              |
|--------------------|----------|-----------------------|-------------------|-----------------------|--------------|
|                    |          | Hazard ratio (95% CI) | P value           | Hazard ratio (95% CI) | P value      |
| Pathologic T stage | 362      |                       |                   |                       |              |
| T1&T2              | 96       | Reference             |                   | Reference             |              |
| T3&T4              | 266      | 1.719 (1.131 - 2.612) | <b>0.011</b>      | 1.391 (0.877 - 2.208) | 0.161        |
| Pathologic N stage | 352      |                       |                   |                       |              |
| N0                 | 107      | Reference             |                   | Reference             |              |
| N1                 | 97       | 1.629 (1.001 - 2.649) | <b>0.049</b>      | 1.364 (0.809 - 2.300) | 0.244        |
| N2                 | 74       | 1.655 (0.979 - 2.797) | 0.060             | 1.506 (0.872 - 2.601) | 0.142        |
| N3                 | 74       | 2.709 (1.669 - 4.396) | <b>&lt; 0.001</b> | 2.303 (1.371 - 3.869) | <b>0.002</b> |
| Pathologic M stage | 352      |                       |                   |                       |              |
| M0                 | 327      | Reference             |                   | Reference             |              |
| M1                 | 25       | 2.254 (1.295 - 3.924) | <b>0.004</b>      | 2.031 (1.142 - 3.611) | <b>0.016</b> |
| Histologic grade   | 361      |                       |                   |                       |              |
| G1                 | 10       | Reference             |                   |                       |              |
| G2                 | 134      | 1.648 (0.400 - 6.787) | 0.489             |                       |              |
| G3                 | 217      | 2.174 (0.535 - 8.832) | 0.278             |                       |              |
| Sex                | 370      |                       |                   |                       |              |

| Characteristics | Total(N) | Univariate analysis   |              | Multivariate analysis |              |
|-----------------|----------|-----------------------|--------------|-----------------------|--------------|
|                 |          | Hazard ratio (95% CI) | P value      | Hazard ratio (95% CI) | P value      |
| Female          | 133      | Reference             |              |                       |              |
| Male            | 237      | 1.267 (0.891 - 1.804) | 0.188        |                       |              |
| BEND3           | 370      |                       |              |                       |              |
| Low             | 185      | Reference             |              | Reference             |              |
| High            | 185      | 1.395 (1.001 - 1.943) | <b>0.049</b> | 1.469 (1.033 - 2.088) | <b>0.032</b> |

Bold values indicate statistical significance at  $p < 0.05$ .

**Supplementary Table S3.** List of the top 50 genes associated with BEND3

| Gene Symbol | Gene ID         | PCC   |
|-------------|-----------------|-------|
| CHRD        | ENSP00000204604 | 0.172 |
| CERK        | ENSP00000216264 | 0.163 |
| DDX39A      | ENSP00000242776 | 0.292 |
| H4C6        | ENSP00000244537 | 0.292 |
| SP110       | ENSP00000258381 | 0.163 |
| TRIM37      | ENSP00000262294 | 0.166 |
| TRAF4       | ENSP00000262395 | 0.202 |
| FAM160A2    | ENSP00000265978 | 0.166 |
| RIOK2       | ENSP00000283109 | 0.237 |
| SMARCA5     | ENSP00000283131 | 0.292 |
| FAM81A      | ENSP00000288228 | 0.166 |
| POC1A       | ENSP00000296484 | 0.162 |
| VIRMA       | ENSP00000297591 | 0.292 |
| NOL6        | ENSP00000297990 | 0.164 |
| PIWIL4      | ENSP00000299001 | 0.174 |
| RNF169      | ENSP00000299563 | 0.292 |
| SLFN5       | ENSP00000299977 | 0.164 |

|          |                 |       |
|----------|-----------------|-------|
| MORN4    | ENSP00000307636 | 0.308 |
| RRP7A    | ENSP00000321449 | 0.164 |
| DENND5A  | ENSP00000328524 | 0.166 |
| ERCC6L   | ENSP00000334675 | 0.9   |
| RBPJ     | ENSP00000345206 | 0.164 |
| DPY30    | ENSP00000345837 | 0.161 |
| SMARCAD1 | ENSP00000351947 | 0.295 |
| USP21    | ENSP00000356981 | 0.42  |
| MKI67    | ENSP00000357643 | 0.292 |
| HDAC1    | ENSP00000362649 | 0.225 |
| FOXP3    | ENSP00000365380 | 0.167 |
| MDC1     | ENSP00000365588 | 0.439 |
| MAP7D2   | ENSP00000368964 | 0.241 |
| SUMO1    | ENSP00000376077 | 0.292 |
| CIT      | ENSP00000376306 | 0.292 |
| ZNF785   | ENSP00000378642 | 0.242 |
| TRPS1    | ENSP00000379065 | 0.303 |
| TULP3    | ENSP00000380321 | 0.292 |
| GATAD2A  | ENSP00000384899 | 0.165 |
| NFATC1   | ENSP00000389377 | 0.166 |
| HSBP1    | ENSP00000392896 | 0.164 |
| KANSL3   | ENSP00000396749 | 0.164 |
| TNIK     | ENSP00000399511 | 0.411 |
| SUMO3    | ENSP00000409666 | 0.292 |
| CFAP97   | ENSP00000409964 | 0.166 |
| CPSF1    | ENSP00000484669 | 0.241 |
| HDAC2    | ENSP00000430432 | 0.195 |
| YTHDC1   | ENSP00000463982 | 0.292 |
| CHD4     | ENSP00000440542 | 0.292 |
| ZFHX3    | ENSP00000493252 | 0.423 |
| BAZ2A    | ENSP00000446880 | 0.292 |

---

**Supplementary Table S4.** GO terms and KEGG pathways enriched in the analysis

| ONTOLOGY | Description                                 | GeneRatio | pvalue      | p.adjust    | qvalue      |
|----------|---------------------------------------------|-----------|-------------|-------------|-------------|
| BP       | histone modification                        | 13/47     | 1.51512E-10 | 1.67724E-07 | 1.3684E-07  |
| BP       | chromatin remodeling                        | 9/47      | 1.69132E-08 | 4.68071E-06 | 3.81881E-06 |
| BP       | protein deacetylation                       | 7/47      | 1.63851E-08 | 4.68071E-06 | 3.81881E-06 |
| BP       | methylation                                 | 7/47      | 3.82184E-05 | 0.003846157 | 0.003137929 |
| BP       | peptidyl-lysine modification                | 7/47      | 4.97661E-05 | 0.004237778 | 0.003457437 |
| CC       | transcription regulator<br>complex          | 7/46      | 0.000123308 | 0.0017109   | 0.001119508 |
| CC       | nuclear chromosome                          | 6/46      | 1.47556E-05 | 0.000327575 | 0.000214345 |
| CC       | heterochromatin                             | 4/46      | 2.05535E-05 | 0.000380239 | 0.000248805 |
| CC       | histone deacetylase complex                 | 4/46      | 2.4334E-05  | 0.000385868 | 0.000252488 |
| CC       | methyltransferase complex                   | 3/46      | 0.00131389  | 0.008578929 | 0.005613524 |
| MF       | DNA-binding transcription<br>factor binding | 7/45      | 0.000132452 | 0.001694798 | 0.001102835 |
| MF       | ATP-dependent activity,<br>acting on DNA    | 4/45      | 0.000115421 | 0.001694798 | 0.001102835 |
| MF       | histone deacetylase binding                 | 4/45      | 0.00025083  | 0.002380089 | 0.001548766 |
| MF       | ubiquitin-like protein ligase<br>binding    | 4/45      | 0.007377383 | 0.028982575 | 0.018859475 |
| MF       | NF-kappaB binding                           | 3/45      | 5.84743E-05 | 0.001286435 | 0.000837106 |
| KEGG     | Viral carcinogenesis                        | 5/21      | 0.000136181 | 0.006945232 | 0.004873847 |
| KEGG     | Notch signaling pathway                     | 3/21      | 0.000434718 | 0.011085318 | 0.00777917  |
| KEGG     | Ribosome biogenesis in<br>eukaryotes        | 3/21      | 0.002584532 | 0.043937044 | 0.030833014 |
| KEGG     | Th1 and Th2 cell<br>differentiation         | 2/21      | 0.022954994 | 0.097558726 | 0.068462264 |
